# Supplementary material for: Rationally designed carbohydrate-occluded epitopes elicit HIV-1 Env-specific antibodies
Source: PubMed Central journal article supplement (PMC6393580; doi:10.1038/s41467-019-08876-w), 2019-02-27
Supplement: 41467_2019_8876_MOESM1_ESM.pdf [file 41467_2019_8876_MOESM1_ESM.pdf]

**Rationally Designed Carbohydrate-Occluded Epitopes Elicit HIV-1  
Env-Specific Antibodies**

*Zhu et al.*

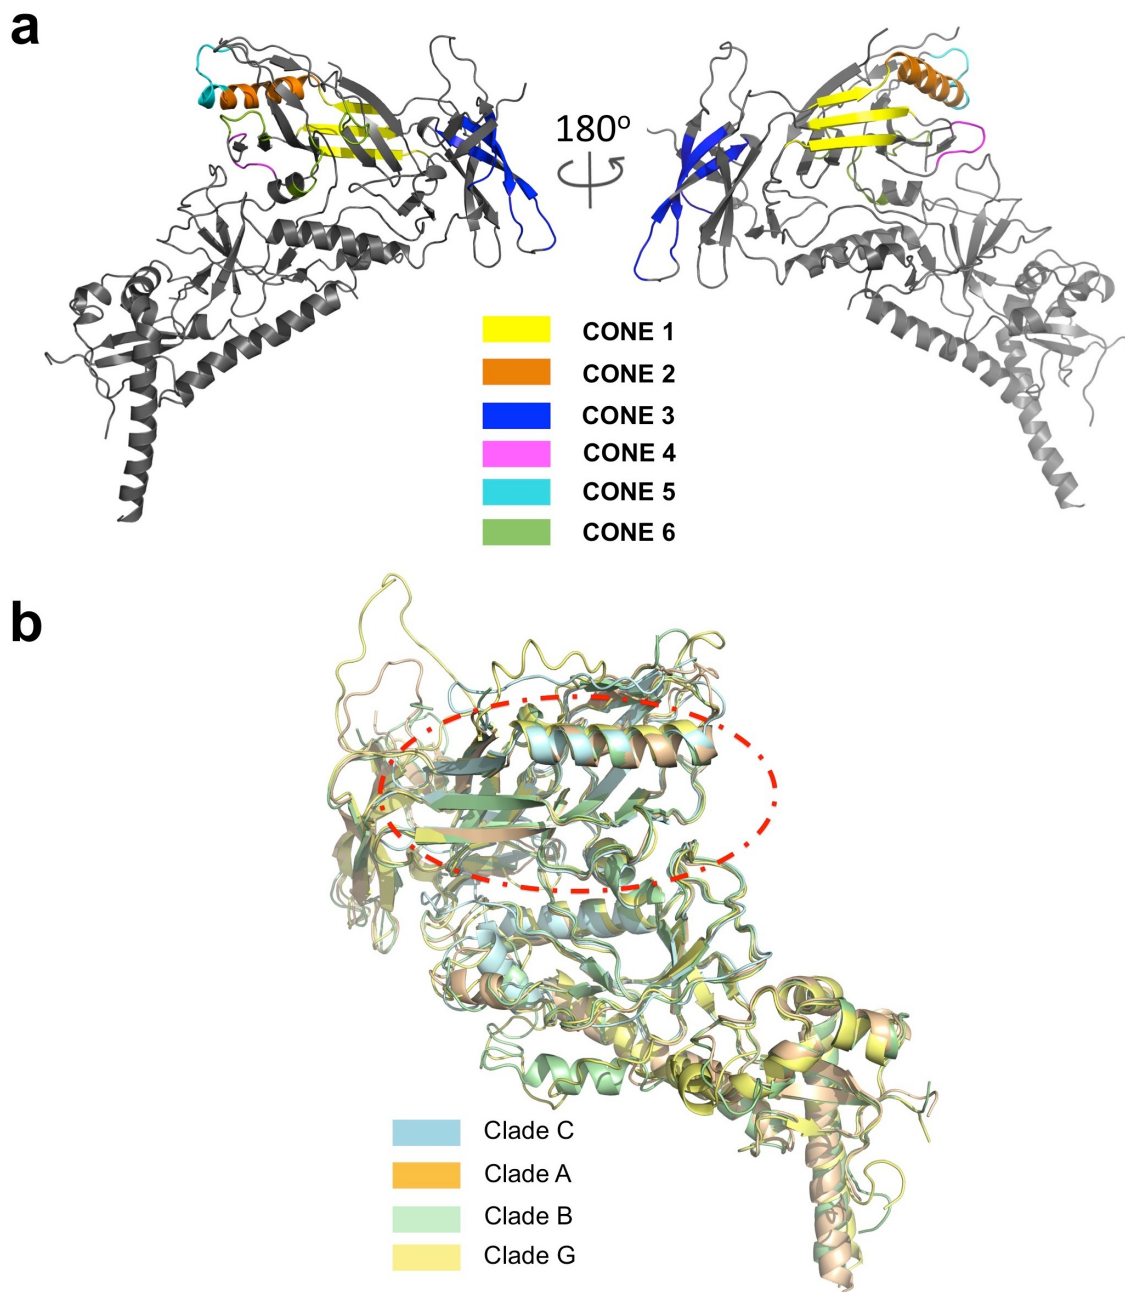

**Supplementary Figure 1. Overview of the CONE structures.** **a**, Six structural elements identified as CONEs in the Env protomer (PDB ID 5FYL). The gp120/gp41 interface was not shown in the structural model. **b**, Superposition of gp120 structures from four HIV-1 clades (PDB 5FYL for clade A Env, 5FYK for clade B, 3TGR for clade C, 5FYJ for clade G). The outer domain regions containing the CONEs are within the region highlighted by red ellipse.

| <b>β12_CONE 1</b> | <b>V</b> | <b>E</b>   | <b>I</b> | <b>V</b>  | <b>C</b> | <b>T</b>   |
|-------------------|----------|------------|----------|-----------|----------|------------|
|                   | V153     | E100 (55%) | I183     | V95 (52%) | C183     | T137 (75%) |
|                   | I28      | K20        |          | N31       |          | I26        |
|                   | L2       | Q16        |          | E25       |          | A7         |
|                   |          | G12        |          | T19       |          | V7         |
|                   |          | N10        |          | M4        |          | M3         |
|                   |          | A7         |          | I3        |          | R2         |
|                   |          | D7         |          | K2        |          | K1         |
|                   |          | P4         |          | L2        |          |            |
|                   |          | R4         |          | Q1        |          |            |
|                   |          | S1         |          | S1        |          |            |
|                   |          | T1         |          |           |          |            |
|                   |          | V1         |          |           |          |            |

| <b>β13_CONE 1</b> | <b>H</b>   | <b>C</b> | <b>N</b>   | <b>I</b> | <b>S</b>   |
|-------------------|------------|----------|------------|----------|------------|
|                   | H141 (77%) | C183     | N157 (86%) | I168     | S128 (70%) |
|                   | Y40        |          | T8         | V12      | N40        |
|                   | S2         |          | K5         | L3       | T11        |
|                   |            |          | D4         |          | D2         |
|                   |            |          | S3         |          | K1         |
|                   |            |          | E2         |          | R1         |
|                   |            |          | I2         |          |            |
|                   |            |          | H1         |          |            |
|                   |            |          | Q1         |          |            |

| <b>β22_CONE 1</b> | <b>N</b>   | <b>I</b> | <b>T</b>   | <b>C</b> | <b>K</b>  | <b>S</b> | <b>N</b>   |
|-------------------|------------|----------|------------|----------|-----------|----------|------------|
|                   | N153 (84%) | I178     | T169 (92%) | C183     | K61 (33%) | S182     | N130 (71%) |
|                   | S10        | V3       | I7         |          | N48       | A1       | S36        |
|                   | K8         | L2       | A4         |          | R22       |          | T7         |
|                   | E3         |          | R1         |          | E16       |          | E3         |
|                   | D2         |          | S1         |          | T16       |          | K3         |
|                   | I2         |          | V1         |          | I11       |          | D2         |
|                   | T2         |          |            |          | S5        |          | I1         |
|                   | A1         |          |            |          | V3        |          | Y1         |
|                   | L1         |          |            |          | D1        |          |            |
|                   | V1         |          |            |          |           |          |            |

| <b>α2 Helix_CONE 2</b> | <b>K</b>  | <b>S</b>  | <b>K</b>  | <b>W</b> | <b>N</b>   | <b>K</b>  | <b>T</b> | <b>L</b> | <b>Q</b>  | <b>R</b>  | <b>V</b> | <b>G</b> | <b>E</b>  | <b>K</b> | <b>L</b> |
|------------------------|-----------|-----------|-----------|----------|------------|-----------|----------|----------|-----------|-----------|----------|----------|-----------|----------|----------|
|                        | K63 (34%) | S27 (15%) | K57 (31%) | W183     | N133 (73%) | K66 (36%) | T168     | L175     | Q78 (43%) | R53 (29%) | V173     | G46      | E73 (40%) | K164     | L181     |
|                        | E48       | E26       | N25       |          | T17        | E35       | A9       | V5       | E45       | K43       | I10      | K44      | K63       | E7       | F2       |
|                        | G20       | K25       | D20       |          | S10        | R24       | I3       | I3       | K17       | Q27       |          | S43      | R18       | R6       |          |
|                        | R18       | T24       | A19       |          | D7         | N18       | M2       |          | N8        | E19       |          | R20      | D6        | Q3       |          |
|                        | A15       | G22       | Q17       |          | E7         | T18       | L1       |          | Y8        | G13       |          | A7       | G6        | T2       |          |
|                        | T7        | A14       | E15       |          | H4         | Q5        |          |          | R7        | N9        |          | V7       | Q5        | S1       |          |
|                        | L2        | D14       | L6        |          | G2         | D5        |          |          | L5        | W8        |          | Q5       | T4        |          |          |
|                        | N2        | Q11       | R5        |          | Y2         | A4        |          |          | G4        | M5        |          | E4       | S3        |          |          |
|                        | Q2        | N6        | T5        |          | I1         | G3        |          |          | I4        | D3        |          | T3       | I2        |          |          |
|                        | D1        | R5        | G4        |          |            | S3        |          |          | H3        | A1        |          | I2       | N2        |          |          |
|                        | I1        | V3        | S4        |          |            | I1        |          |          | A2        | L1        |          | N1       | A1        |          |          |
|                        | S1        | L1        | V4        |          |            | Y1        |          |          | D1        | S1        |          | H1       |           |          |          |
|                        | W1        | H1        | --2       |          |            |           |          |          | S1        |           |          |          |           |          |          |
|                        | --2       | F1        |           |          |            |           |          |          |           |           |          |          |           |          |          |
|                        |           | W1        |           |          |            |           |          |          |           |           |          |          |           |          |          |
|                        |           | --2       |           |          |            |           |          |          |           |           |          |          |           |          |          |

| <b>Loop C_CONE 4</b> | <b>L</b>   | <b>A</b> | <b>E</b>   | <b>E</b>   | <b>E</b>   | <b>I</b> |
|----------------------|------------|----------|------------|------------|------------|----------|
|                      | L174 (95%) | A178     | E170 (93%) | E104 (57%) | E138 (75%) | I171     |
|                      | I7         | S4       | K8         | G42        | G20        | V9       |
|                      | T1         | V1       | G2         | K28        | D17        | T3       |
|                      | R1         |          | D1         | Q5         | K6         |          |
|                      |            |          | --2        | R2         | N1         |          |
|                      |            |          |            | N1         | R1         |          |
|                      |            |          |            | --1        |            |          |

| <b>Loop E_CONE 5</b> | <b>K</b>  | <b>E</b>   | <b>H</b>   | <b>F</b> | <b>P</b>   | <b>--</b> | <b>N</b>   | <b>K</b>   | <b>T</b>   |
|----------------------|-----------|------------|------------|----------|------------|-----------|------------|------------|------------|
|                      | K55 (30%) | E130 (71%) | H132 (72%) | F169     | P126 (69%) | K1        | N154 (84%) | K146 (80%) | T147 (80%) |
|                      | R37       | K35        | Y29        | Y10      | N8         | N1        | G7         | R13        | N17        |
|                      | Q22       | G6         | L13        | L2       | S8         | --181     | D6         | T6         | E5         |
|                      | A20       | T4         | Q3         | I1       | L7         |           | S6         | S4         | K4         |
|                      | E16       | N2         | R2         | S1       | H6         |           | K5         | G3         | S4         |
|                      | G7        | R2         | C1         |          | T2         |           | E2         | N3         | A2         |
|                      | S7        | V2         | E1         |          | A1         |           | A1         | --2        | P2         |
|                      | L6        | A1         | F1         |          | D1         |           | P1         | A1         | D1         |
|                      | T5        | I1         | S1         |          | R1         |           | --1        | D1         | I1         |
|                      | H2        |            |            |          | E1         |           |            | E1         |            |
|                      | N2        |            |            |          |            | -22       |            | I1         |            |
|                      | V2        |            |            |          |            |           |            | M1         |            |
|                      | Y2        |            |            |          |            |           |            | Q1         |            |

**Supplementary Figure 2. Protein sequence variances of CONEs 1, 2, 4, and 5.** The numbers in parentheses indicate the sequence conservation rate of exposed CONE residues in the consensus sequence.

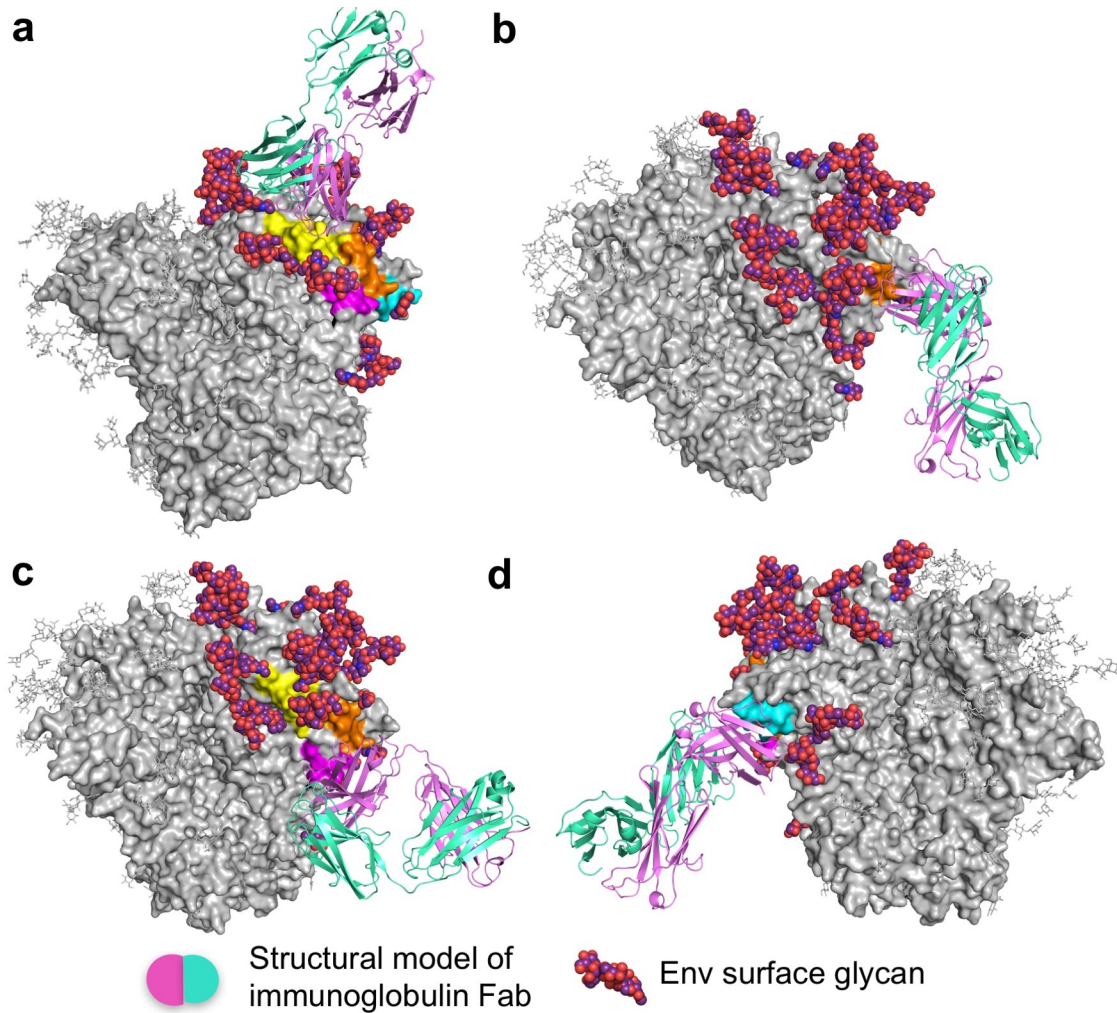

**Supplementary Figure 3. Antibody recognition of the CONEs in computational models.** CONEs are associated with one or more specific glycosylation sites. The absence of these carbohydrates as the natural course of viral sequence variation exposes the underlying structure, which can be targeted by antibodies: **a**, CONE 1; **b**, CONE 2; **c**, CONE 4; **d**, CONE 5. In the docking models of 'pseudo-antibody' antigen-binding fragment (Fab) and Env (grey surface), the glycans are shown as space-filling spheres and Fabs are shown as cartoon ribbons. CONEs are highlighted with the same color pattern as in Fig.1 of the main text.

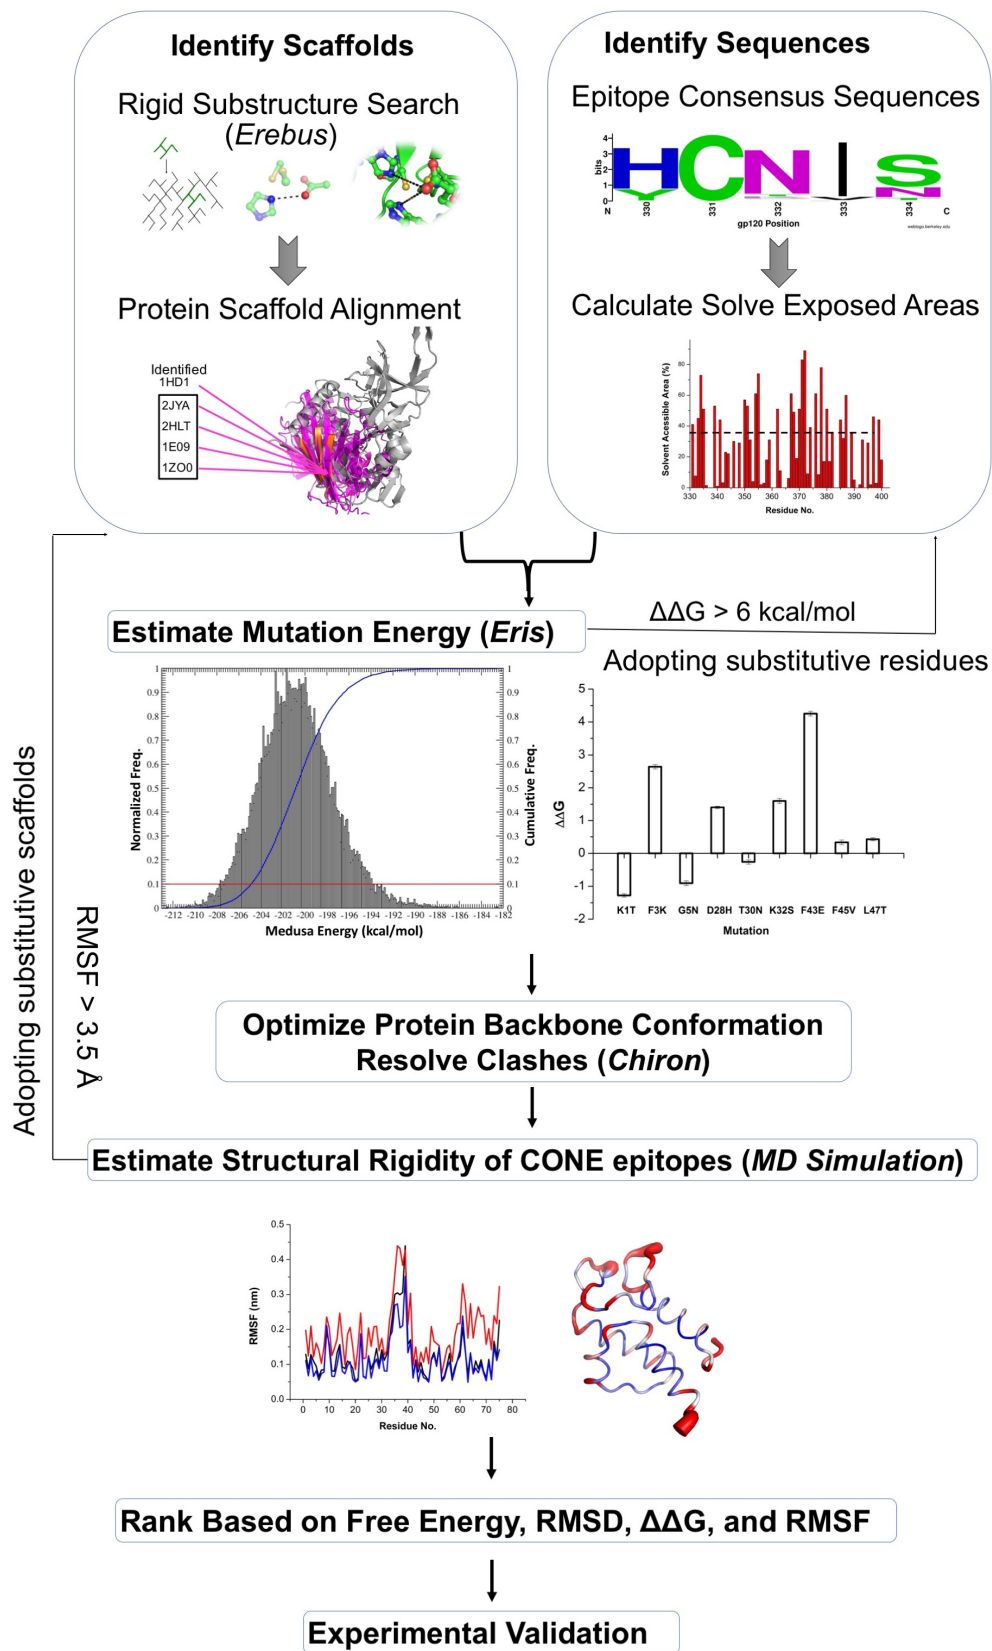

Supplementary Figure 4. Flow chart illustrating the key steps in the design of CONE immunogens. Representative outcome of each step was shown.

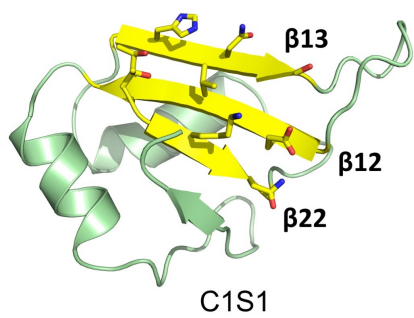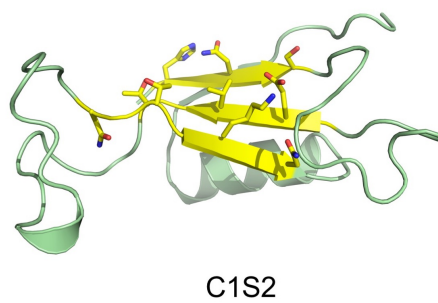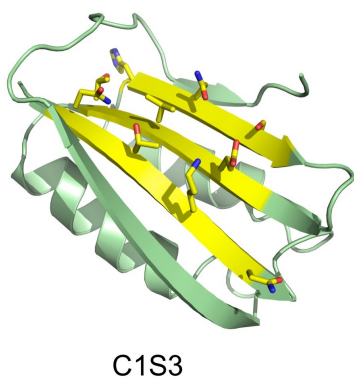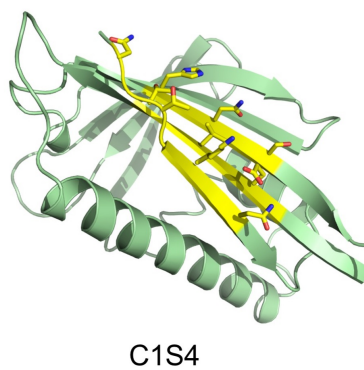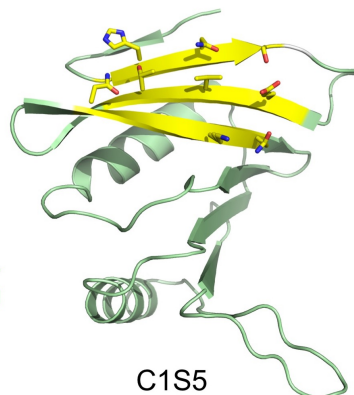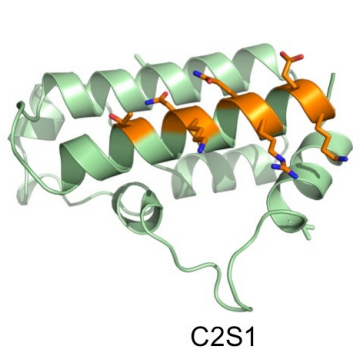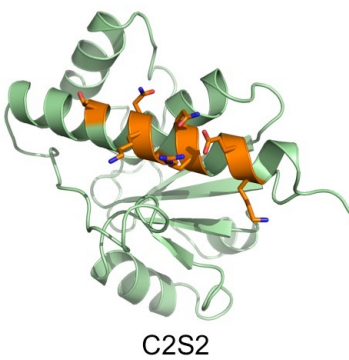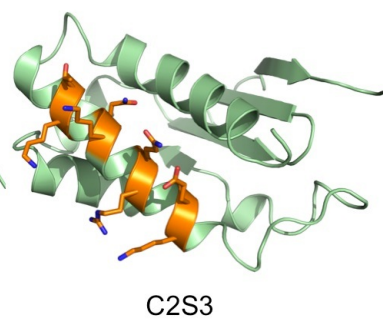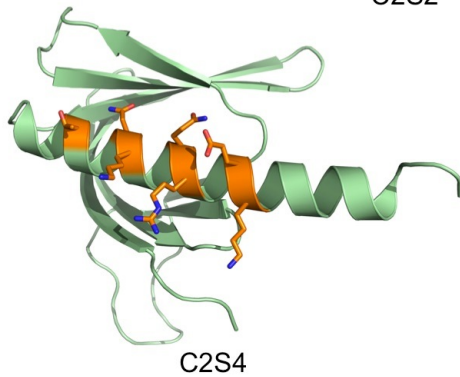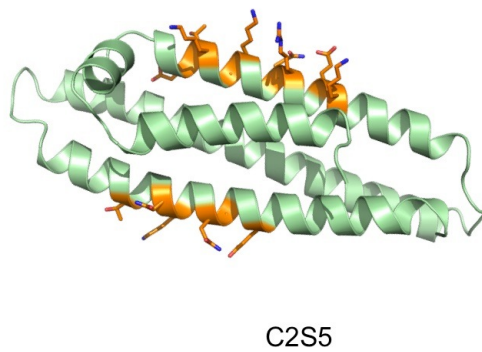

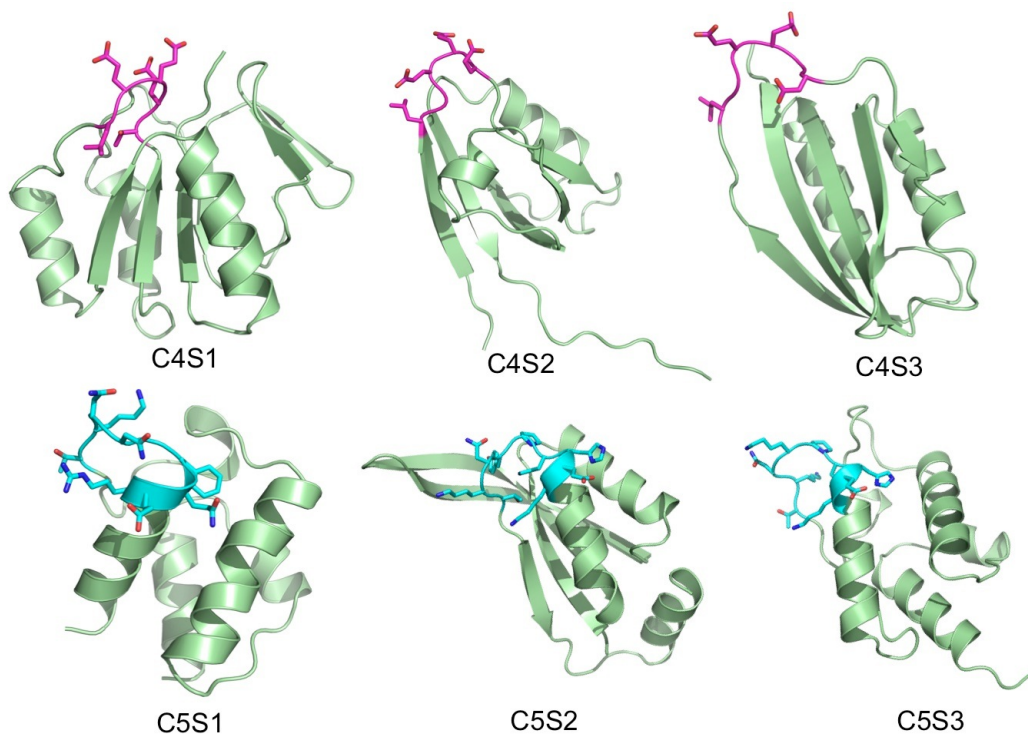

**Supplementary Figure 5. Computational design models that present CONEs in heterologous lightweight protein scaffolds.** Five designs were shown for CONEs 1 and 2, and three designs were shown for CONEs 4 and 5, adopting the consensus sequences shown in Fig. 1d. CONEs are highlighted with the same color pattern as in Fig.1. The  $\beta$  12/13/22 strands were labeled on C1S1 and similar arrangements of three strands were adopted in other CONE 1 designs.

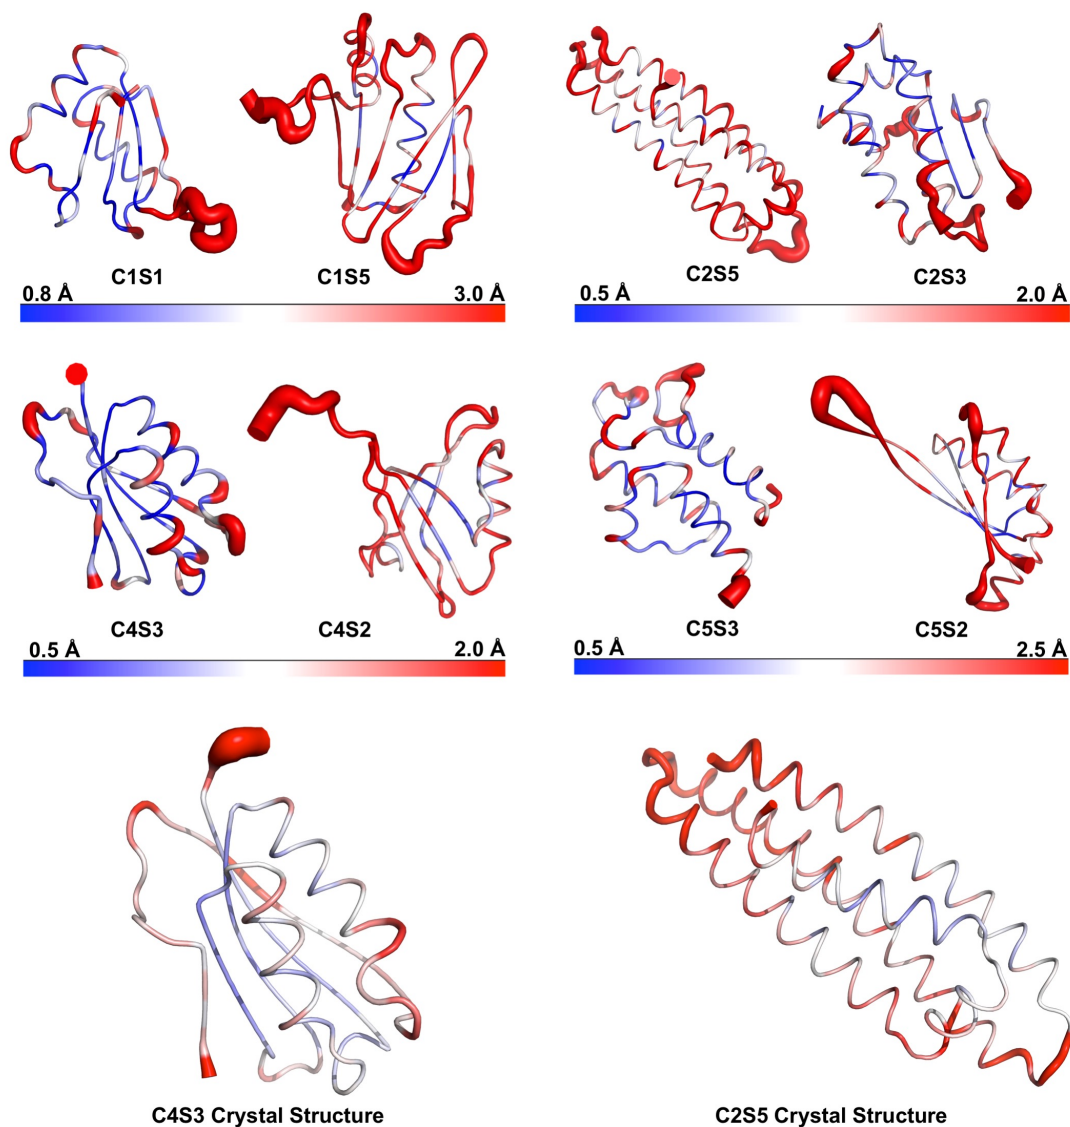

**Supplementary Figure 6. The conformational plasticity of each design assessed with RMSF (for computational model) and B factor (for crystal structure).** For each CONE, the primary designs (C1S1, C2S5, C4S3, and C5S3; used for immunization) exhibited higher structural rigidity (lower RMSF) in comparison to the alternative designs (C1S5, C2S3, C4S2, and C5S2). The similarity between the crystal structure B factors (PDB 6CBU for C4S3 and 6CFE for C2S5) and the simulated RMSF of corresponding models demonstrated that molecular dynamics could predict the relative structural rigidity of grafted epitopes. Source data are provided as a Source Data file.



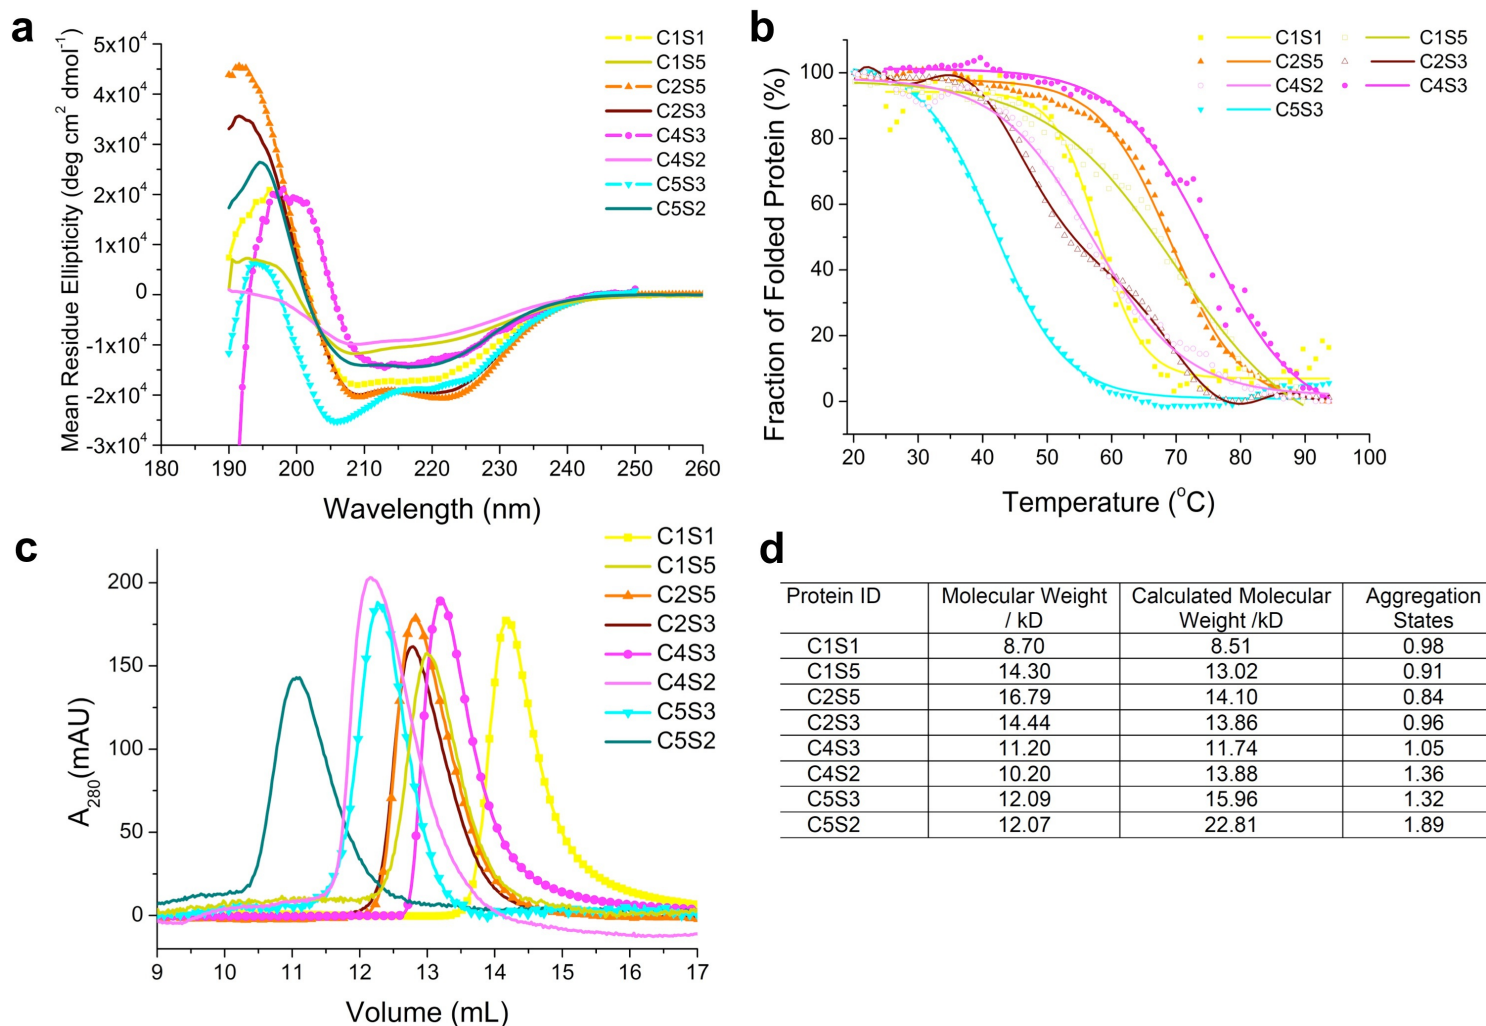

**Supplementary Figure 7. Biophysical characterization of the designed CONE-immunogens.** **a**, The CD spectra of eight designs indicated that expected secondary structures were adopted in solution. **b**, The denaturation curves obtained by plotting % folded protein (based on the molar ellipticity at 220 nm) of six designs were indicative of two-state transitions (C2S3 featured a three-state transitions) and properly folded protein structures in solution. **c**, Analytical SEC revealed that seven designs folded into monomers; C5S2 formed a dimer in solution. **d**, Table lists actual molecular weights and those calculated based on SEC. An aggregation state of 1 is indicative of a monomer and 2 indicates a dimeric state. Source data are provided as a Source Data file.

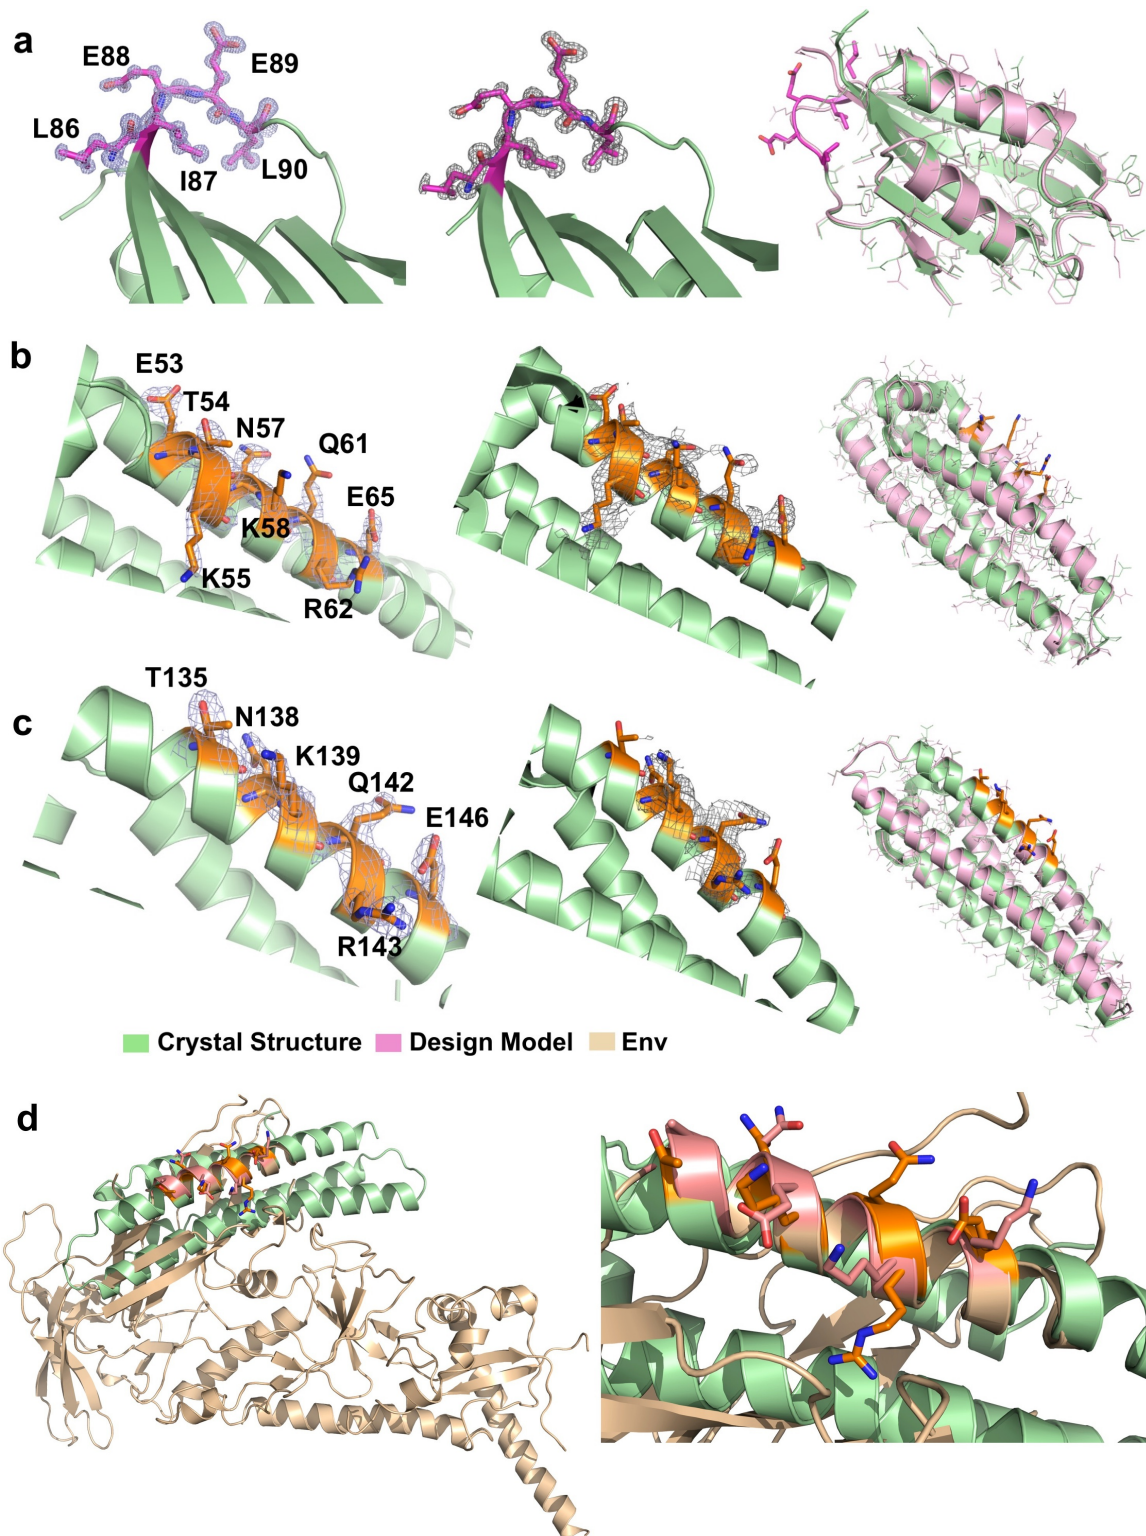

**Supplementary Figure 8. The conformations of CONE 2 and CONE 4 epitopes in crystal structures.** **a**, (Left) 2Fo-Fc electron density of grafted loop C in C4S3 (resolution 1.2 Å, contoured at 2.0  $\sigma$ ). (Middle) To further validate the conformation of CONE epitopes and reduce possible structural bias, the coordinates of grafted epitopes (two segments of  $\alpha$ -helix for C2S5 and loop C for C4S3) were deleted in the initial structural model of refinement. The Fo-Fc omit map (contoured at 3.0  $\sigma$ ) of resolved epitopes was shown as a comparison to the 2Fo-Fc map. (Right) C4S3 crystal structure aligned to the design model (pink). The CONE-residues were shown as sticks (magenta) and other residues were shown as lines. C4S3 possesses two intertwining  $\beta\alpha\beta$  motifs and the high resolution of C4S3 crystal structure allowed us to unambiguously determine the conformation of grafted loop C. **b-c**, (Left) 2Fo-Fc map of grafted  $\alpha 2$  helix in two different segments of C2S5 (resolution 2.0 Å, contoured at 1.3  $\sigma$ ). (Middle) Fo-Fc omit map (refined as described for C4S3, contoured at 2.0  $\sigma$ ). (Right) C2S5 crystal structure aligned to design model (pink). The CONE-residues were shown as sticks (orange) and other residues were shown as lines. **d**, The second grafted  $\alpha 2$  helix aligned to gp120 CONE 2 region (PDB 5FYL). Source data are provided as a Source Data file.

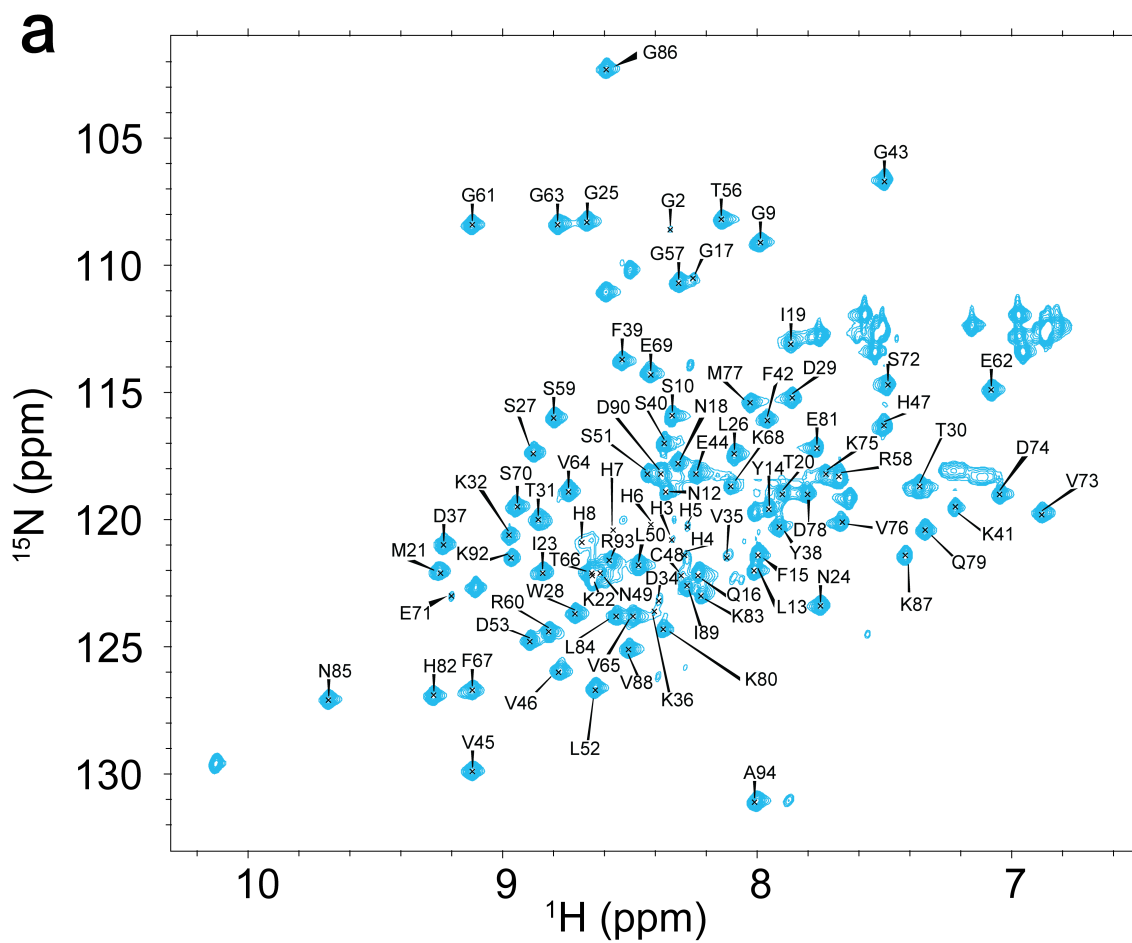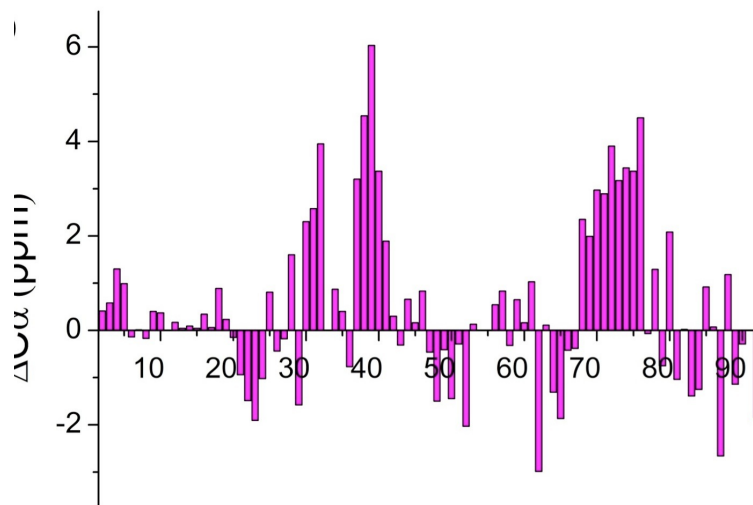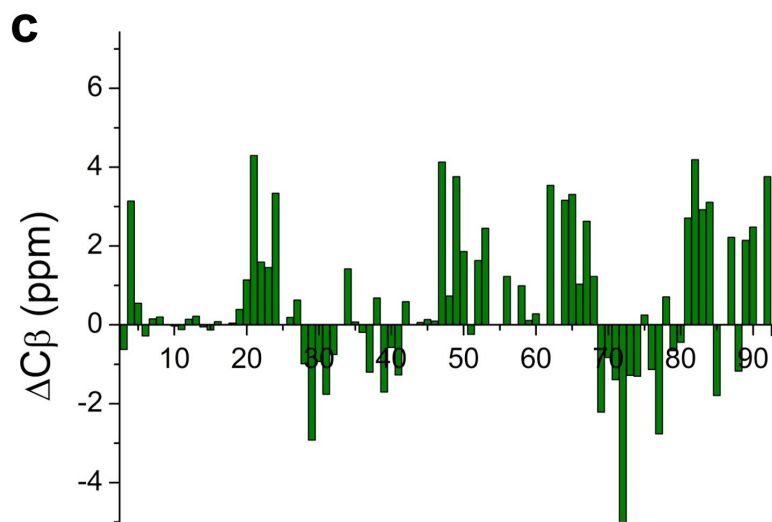

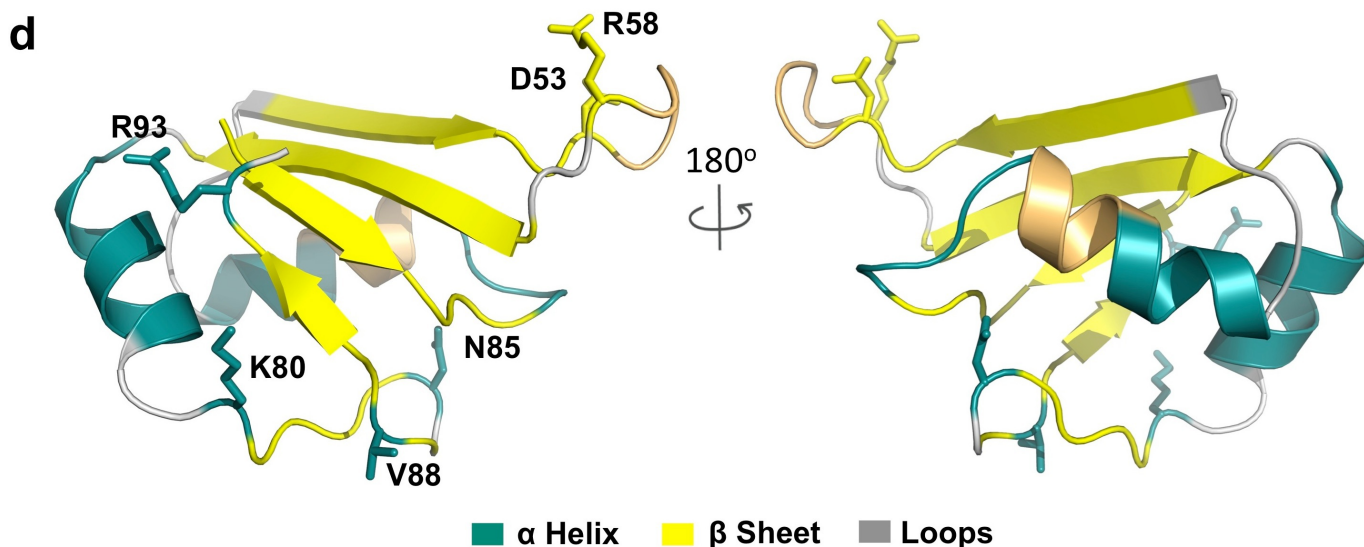

**Supplementary Figure 9. NMR characterization of C1S1 conformation in solution.**

**a**,  $^1\text{H}$ - $^{15}\text{N}$  HSQC spectrum of C1S1. The assignments were determined on Sparky and MARS using HSQC, HNCACB, and CBCA(CO)NH spectra.; **b-c**, Differences of chemical shifts ( $\Delta C\alpha$  and  $\Delta C\beta$ ) were calculated for each residue by subtracting the experiment chemical shifts of  $C\alpha$  and  $C\beta$  from the random coil values (see Methods and Fig. 2c). **d**, The residues that adopt  $\alpha$ -helical ( $\Delta C\alpha - \Delta C\beta > 1$  ppm) or  $\beta$ -sheet ( $\Delta C\alpha - \Delta C\beta < -1$  ppm) structures are indicated on the C1S1 design model in dark cyan and yellow, respectively. Gray-colored regions indicate conformation of coils ( $|\Delta C\alpha - \Delta C\beta| < 1$  ppm) and they mostly reside in the loops. Because the His-tag was adjacent to grafted CONE 1 residues (unlike other designs), the NMR study was performed on His-tagged C1S1. The His-tag adopted random-coil conformation and did not interfere with the  $\beta$ -sheet conformation of CONE 1 residues.

In the loop connecting  $\beta 13$  and  $\beta 12$  (52-LDPITGR-60), D53 and R58 (shown as sticks) adopted a  $\beta$ -sheet conformation, probably due to formation of salt bridge. In the C terminal loop (79-QKEHKLNGKV-88), K80, N85, V88, and R93 (shown as sticks) adopted  $\alpha$ -helical conformation (they form 'kinks' in the computational model). The wheat colored regions (33-KDVKD-37 and 52-LDPITGR-60) indicate assignments of medium or low confidence. T31, K33, P54, I55, and P91 could not be assigned. The conformations of these two segments also feature high plasticity in simulations (Supplementary Fig. 6). G17, G25, G43, G57, G61, G63, and G86 have no  $C\beta$  and their  $\Delta C\alpha - \Delta C\beta$  values were not calculated. Source data are provided as a Source Data file.

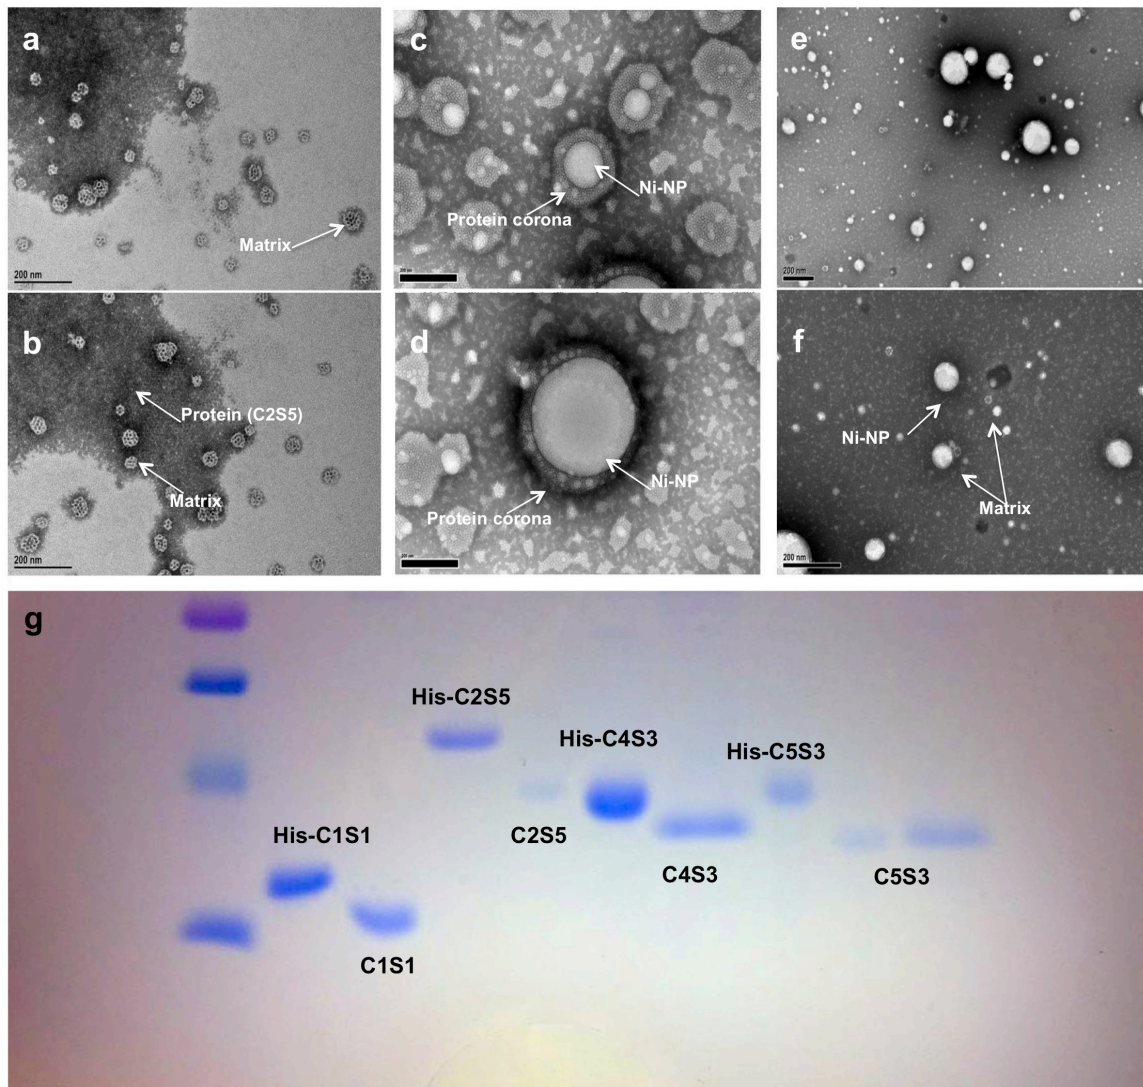

**Supplementary Figure 10. Characterization of the immunogens used in rabbit immunization.** **a-f**, Representative tunneling electron microscopy imaging of nanoparticles (NP): **a, b** Matrix-M adjuvant + C2S5 protein, **c, d** NPs + C2S5 protein, and **e, f** NPs + C2S5 protein + Matrix-M adjuvant. Scale bars in all panels, 200 nm. **g**, His-tagged immunogens were used with nanoparticles and His-tag-cleaved proteins were used with incomplete Freund's adjuvant.

**a**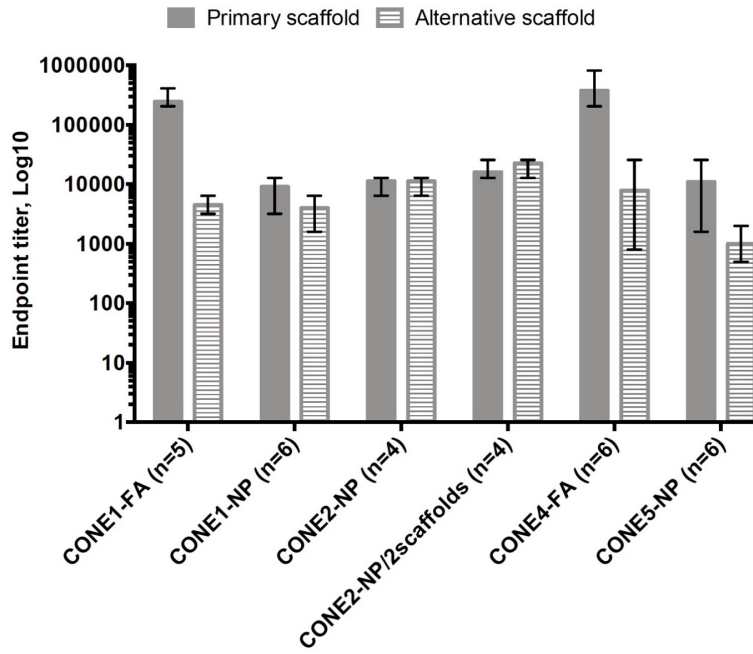**b**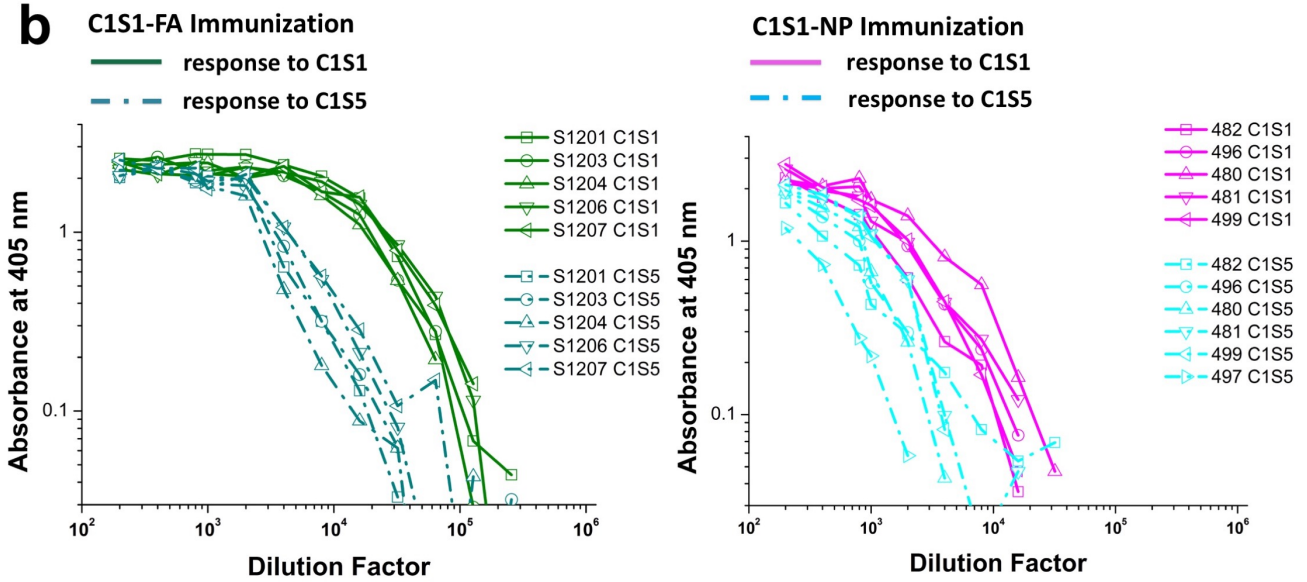**c**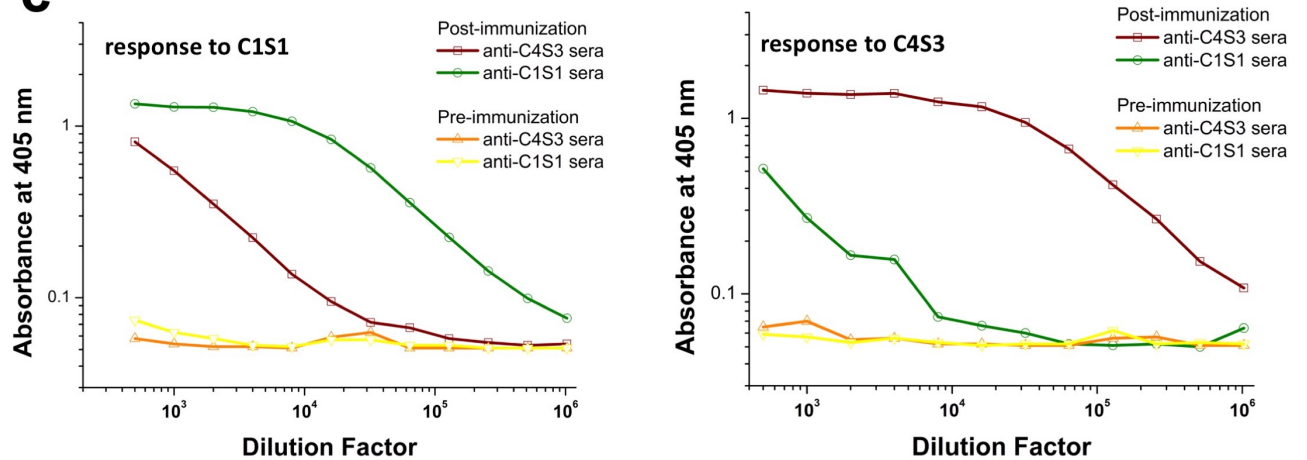

**Supplementary Figure 11. ELISA characterization of the rabbit sera and interactions to CONE immunogens. a,** Responses of sera to primary scaffolds (C1S1, C2S5, C4S3, and C5S3) and alternative scaffolds (C1S5, C2S3, C4S2, and C5S2). The average titer of a group of rabbit sera from the same CONE-immunization was reported. Two immunogens designed for the same CONE share the substructure formed by the epitope itself, while the rest of the protein is different (see Supplementary Figure 5). FA: incomplete Freund's adjuvant; NP: nanoparticles. n=number of rabbits (4-6, indicated for each immunogen). Error bars represent standard deviation. **b,** Examples of ELISA characterization of anti-C1S1 sera. Each line represented the sera sample from a rabbit immunized with C1S1 (rabbit ID indicated as S1201, 481, *etc.*). The responses to C1S1 and the alternative scaffold (C1S5) were compared. Since C1S1 and C1S5 share the similarity only at the grafted epitope region, the responses of anti-C1S1 sera to C1S5 may indicate specificity to the CONE 1 epitope. **c,** The anti-C1S1 sera reacted weakly to C4S3, as did the anti-C4S3 sera to C1S1, suggesting their specificities to respective epitopes. The responses from pre-immunization sera were viewed as the background signal. Source data are provided as a Source Data file.



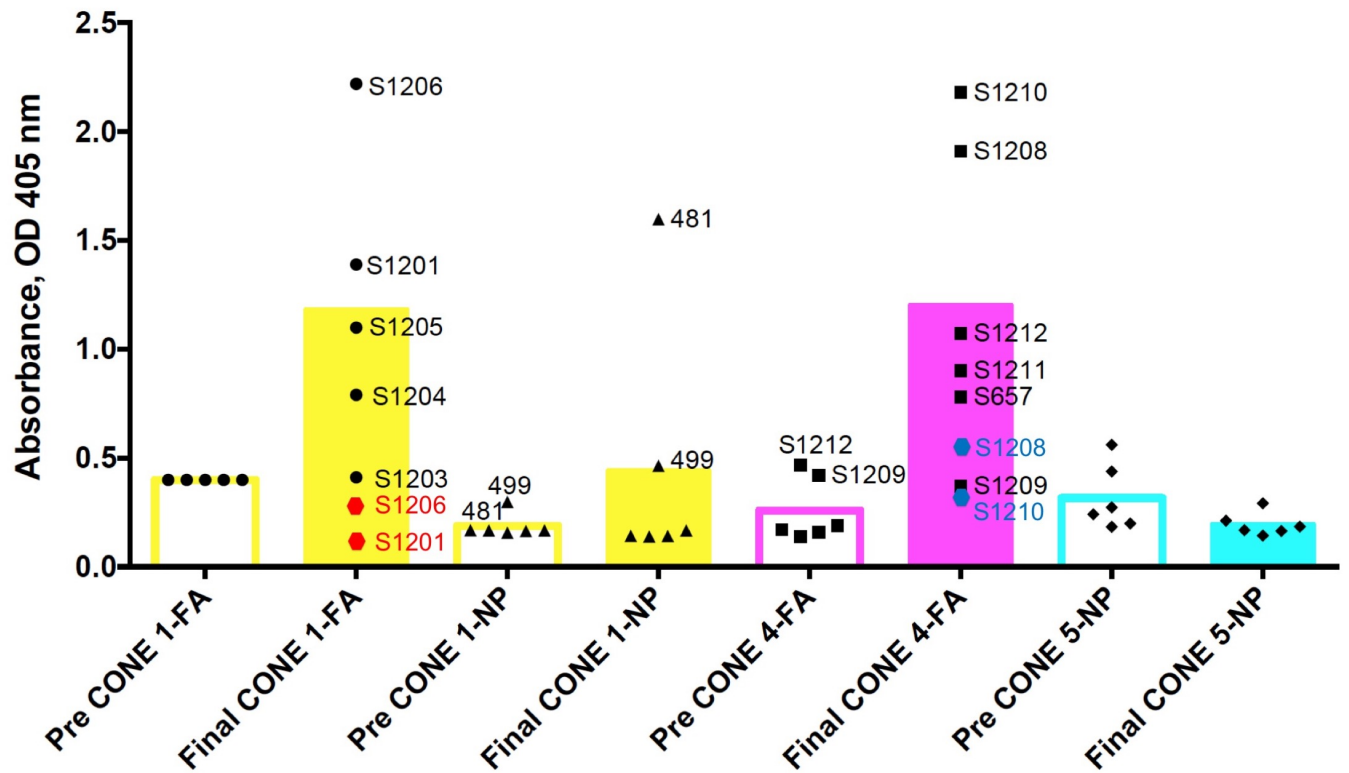

**Supplementary Figure 12. Binding of immune sera to the deglycosylated Env protein (SOSIP) evaluated by ELISA.** The sera were harvested in final immunization and tested at a 1:800 dilution. The signal from serum of individual rabbits were plotted (rabbits ID indicated as S1201, 481, *etc.*) The responses from the pre-immunization sera are shown as controls (response = 0.2 - 0.5). The sera S1206, S1201, S1210, S1208, *etc.* featured elevated binding capacity to Env (response = 1.0 - 2.3). For comparison, their responses to glycosylated SOSIP were shown as red and blue dots (1:800 dilution, response = 0.1 - 0.5). The glycan shield hindered the sera's reactivity to Env, while the existence of glycan holes on the surface of deglycosylated Env rendered potential susceptibilities to the sera. Source data are provided as a Source Data file.

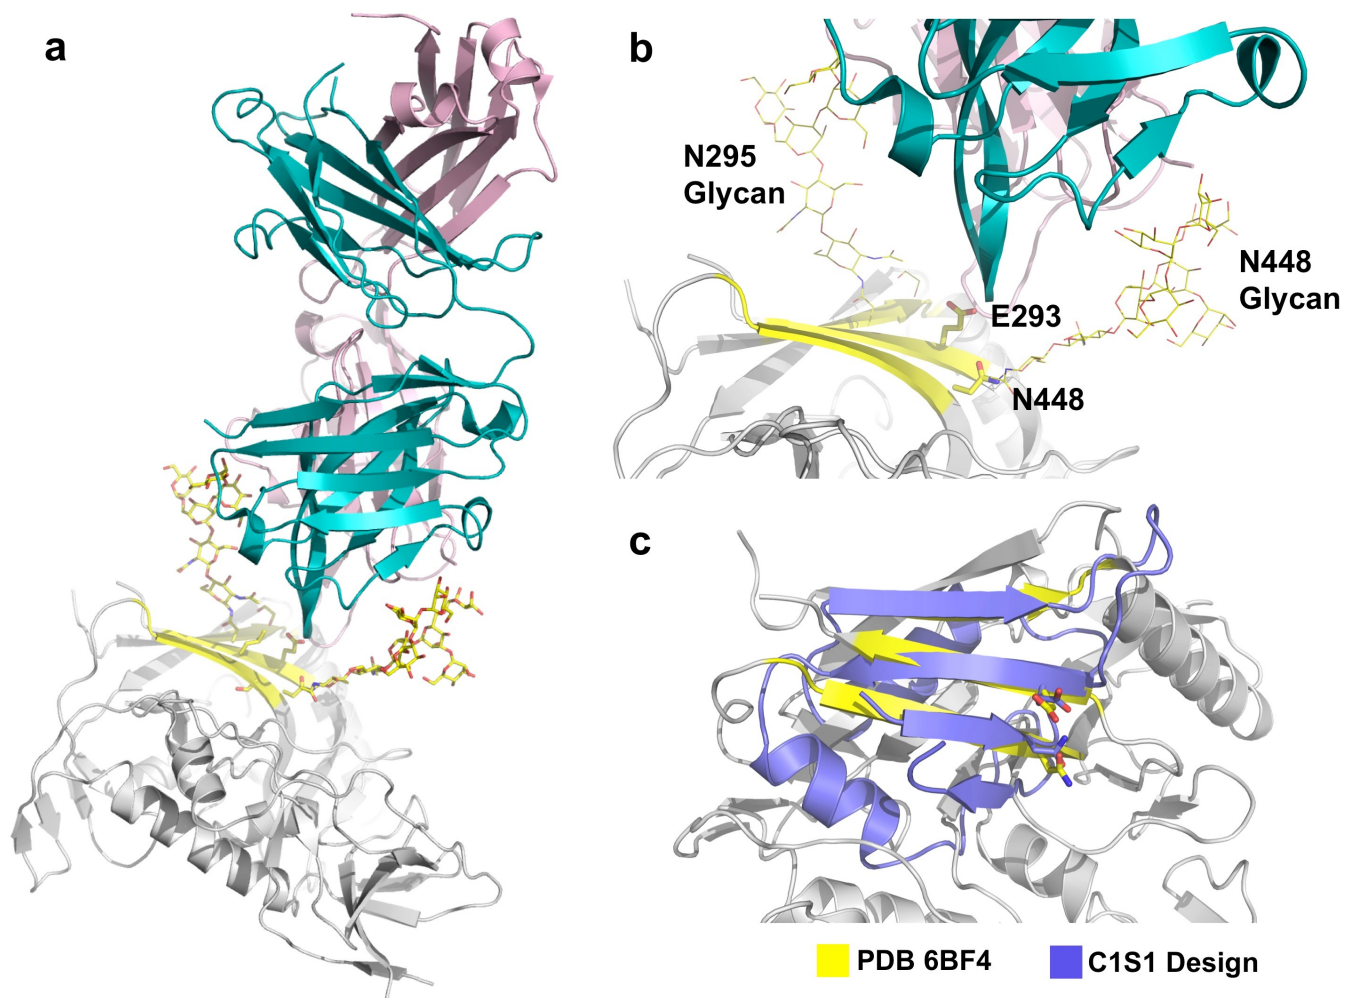

**Supplementary Figure 13. The neutralizing antibody VRC-PG05 recognizes CONE 1-related epitopes. a,** Crystal structure (PDB 6BF4) of VRC-PG05 Fab and gp120 core (truncated version of full-length gp120). The CONE 1-related regions were highlighted in yellow. **b,** Close-up view of VRC-PG05 epitopes, including E293, N448, and two glycans. **c,** Alignment between VRC-PG05 epitope and C1S1 design model. The conformation of grafted Glu and Asn residues (shown as sticks, slate) resembles the conformation of gp120 residues (yellow).

**Supplementary Table 1. Scaffolds chosen in computational protein design.**

| <b>CONE</b>                | <b>ID</b> | <b>PDB</b> | <b>Methods</b> | <b>Protein Name</b>                                               |
|----------------------------|-----------|------------|----------------|-------------------------------------------------------------------|
| CONE 1<br>$\beta$ 12/13/22 | C1S1      | 1HD1       | NMR            | Ribonucleoprotein RNA-binding domain                              |
|                            | C1S2      | 2JYA       | NMR            | Uncharacterized protein ATU1810                                   |
|                            | C1S3      | 2HLT       | NMR            | Probable acyl phosphatase                                         |
|                            | C1S4      | 1E09       | NMR            | Cherry allergen Pru av 1                                          |
|                            | C1S5      | 1ZO0       | NMR            | Antizyme isoform 1 from rat                                       |
| CONE 2<br>$\alpha$ 2 Helix | C2S1      | 2H60       | NMR            | Transcription activator SNF2L4 bromodomain                        |
|                            | C2S2      | 2FEK       | NMR            | Tyrosine phosphatase Wzb                                          |
|                            | C2S3      | 2Z15       | X-Ray          | Human Tob1                                                        |
|                            | C2S4      | 1UNP       | X-Ray          | Protein kinase B pleckstrin homology domain                       |
|                            | C2S5      | 1BZ4       | X-Ray          | Apolipoprotein E                                                  |
| CONE 4<br>Loop C           | C4S1      | 2F19       | X-Ray          | Bartonella henselae outer domain protein                          |
|                            | C4S2      | 1N7E       | X-Ray          | AMPA receptor interacting protein GRIP 6 <sup>th</sup> PDZ domain |
|                            | C4S3      | 2W4<br>C   | X-Ray          | Acylphosphatase 1                                                 |
| CONE 5<br>Loop E           | C5S1      | 2CG<br>Q   | X-Ray          | Acy carrier protein ACPA                                          |
|                            | C5S2      | 1P1L       | X-Ray          | Periplasmic cation tolerance protein CUTA                         |
|                            | C5S3      | 2CE7       | X-Ray          | Mitochondrial acyl carrier protein                                |

**Supplementary Table 2. Sequences of designed proteins‡.**

| <i>Protein ID</i> |                                                                                                                                                                                           |
|-------------------|-------------------------------------------------------------------------------------------------------------------------------------------------------------------------------------------|
| <b>C1S1</b> §     | <u>NITMKIN</u> GLSWDTTKKDVKDYFSKFGVHV <u>HCNLS</u> LDPITGRSR <u>GEGVVT</u> FKESSEVDKVMQKEHKLNKVIDPKRA                                                                                     |
| C1S2              | QGHM <u>HANIS</u> RPAKTAMQSGTAKTNV <u>WELVFT</u> AEVPRKIDPIMGYTSSSDM <u>NQTVKLN</u> FETQEQAEAYAQRKGIEYRVILPKEATRKKVVSYTDNFRFRNTQPWTHGS                                                    |
| C1S3              | <u>NLTYKINVD</u> GRVQGVGFYFVQMEADKRKL <u>AGNVN</u> NRDDGR <u>VEIVAT</u> GPENALQSFVEAVKNGSPFSKVTDISVTESSRSLEGHHRFSIVY S                                                                    |
| C1S4              | G <u>NFTYKSN</u> FTSEIPPPRLFAFVLDADNLVPKIAPOAIKHSEILEGDGGPGTIKKITFGEQSQYGYVKKHIDSIDKENYSYSYTLIEGDALGDTLEKI <u>HYNTS</u> LVASPSGGSI <u>IESVST</u> YHTKGNVEIKEEHVKAGKEKASNLFKLIETYLKGHPDAYN |
| <b>C1S5</b>       | <u>ILYS</u> DERL <u>HVNES</u> PTSNDKT <u>RELVIT</u> CTLTEAK <u>NVTWKAN</u> WNGGGLYIELPAGPLPEGSKDSFAALLEFAEEQLRADHVFICFPKNREDRAALLRTSFLGFEIVRPGHPLVPKRPDACFMVYTL                           |
| C2S1              | MSPNPPNLTKMKKIVDAVIKYKDSSSGRQLSEVFIQLPSRKELPEYYELIRKPVDFKKIKERIRNHKYRSLNDLEKDVMLLCQNWQTFNLEGLIYED <u>STVLNKVFORVREKI</u> ELVPRGSLEHHHHHH                                                  |
| C2S2              | SHMFNNILVVCVGNICRSPTAERLLQRYHPELKVESAGLGALVGKGADPTAISVAAEHQLSLEGHCARQISRRLCRNYDLILTMEKRHIERLCEMAPEMRGKVMFLFGHWDNECEIPDPYRKSRETF <u>TKVYKL</u> <u>LORSAEKWAQALN</u> AEQV                   |
| <b>C2S3</b>       | SSGMQLEIQVALNFIISYL NKNLPRRR <u>VTKFNKELQRLLEKK</u> YEGHWYPEKPYKSGSFRCIHIGEKVDPVIEQASKESGLDIDDVVRGNLPQDLSVWIDPFEVSYQIGEKGPVKVLYVDDNSGPSSG                                                 |
| C2S4              | MSDVAIVKEGWLHGRGEYIKTWRPRYFLLKNDGTFIGYKERPDVDQREAPLNNFSVAQCQLMKTERPRPNTFIIRCLQWTTVIERTFHVETPEE <u>RTEWNKAIQVAEKL</u> KKQEEEEMDFR                                                          |
| <b>C2S5</b>       | SGQRWELALGRFWDYLRWVQTLSEVQVEELLSSQV <u>ETKLNKLMQRTMEEL</u> KAYKSELEEQLTPVAEETRARLSKELQAAQARLGADMEDVCGRLVQYRGEVQAMLGQSTEELRVRL <u>ATHLNKLRQRILLED</u> ADDLQKRLAVYQAG                       |
| C4S1              | MSHAIQIREAHFPGRAPIDAYGNGGFRFADMSHRGSIICIPSGIYGIDWRGPVPTQEDISRVL EESDQIEVLLL <u>GTE</u> <u>EEL</u> LRLPEELRVLLWEKRISDSTMSTGAAVRTFNVLLAEDRAVAALLFAVE                                        |
| <b>C4S2</b>       | SSGAIYTVEL <u>LREEEP</u> LGITISGTEEPDPIISSLTKGGLAERTGAIHIGDRILAINSSSLKGKPLSEAIHLLQMAGGVITLKIKKQTDAPASS                                                                                    |
| <b>C4S3</b>       | MAEGNTLISVDYEIFGKVQGVFRKHTQAEGKGLGLVGVQNTDRGTVQGGQLQGPISKVRHMQEWLETRGSPKSHIDKANFNNEK <u>LIEELD</u> YSDFQIVA                                                                               |
| C5S1              | MKHHHHHHHPMSDYDIPTTENLYFQGAMEEAINATI <u>KEILPTNKTI</u> TANQVLVDYGFDSLKLFQLITTTLEDTFDIAISFRDAQNI KTVGDVYTSVAVWFPETAKPAPLGKGT                                                               |
| <b>C5S2</b>       | MHNFIYITAPSL EEAERLAKRLLKLAACVNIFPIKSFFWWEKIEAATEFAMIVKTRS EKFAEVRDEV <u>KEHHPYNKI</u> CIDAIPIERGLKEFLDWIDETVE                                                                            |
| <b>C5S3</b>       | GANETTKQESPVVDTDINAVTNYIVGMC <u>KEFLPKNKI</u> VTSSKLEELTQSEDRTWDCLDTVEFVLDVEEIFDVTVPDEVADNFQTLQEIAADFVVSERAKAGKFMKDQ                                                                      |

‡ The CONE-related epitopes were highlighted in yellow. A glycine remained as the N-terminus residue in TEV-cleaved protein samples. For proteins with Hi- tags, the sequence of MGHHHHHHGSENLYFQG was added to the N-terminal.

§ The proteins successfully purified and tested with biophysical assays were marked in red color. The alternative scaffolds of each CONE were also indicated with underlines.

**Supplementary Table 3. Designed immunogens used in rabbit immunization.**

| Immunogen | Env Region       | Dose                           | Adjuvant        | No. of Rabbits |
|-----------|------------------|--------------------------------|-----------------|----------------|
| C1S1      | $\beta$ 12/13/22 | 300 $\mu\text{g}$              | FA <sup>‡</sup> | 5              |
| C1S1      | $\beta$ 12/13/22 | 300 $\mu\text{g}$              | NP              | 6              |
| C2S5      | $\alpha$ 2 helix | 300 $\mu\text{g}$ <sup>§</sup> | NP              | 4              |
| C2S5+C2S3 | $\alpha$ 2 helix | 300 $\mu\text{g}$ <sup>§</sup> | NP              | 4              |
| C4S3      | loop C           | 300 $\mu\text{g}$              | FA              | 6              |
| C5S3      | loop E           | 300 $\mu\text{g}$              | NP              | 6              |

<sup>‡</sup> FA: incomplete Freund's adjuvant, NP: nanoparticle.

<sup>§</sup> Immunization plan was amended after 8 weeks, and the amount of immunogen was increased from initial 30  $\mu\text{g}$  (Matrix-M adjuvant) to 300  $\mu\text{g}$  (nanoparticle).

**Supplementary Table 4. Characterization of NPs used in rabbit immunization.**

| Ni-NP Conc.     | Particle size (90°) (nm) <sup>‡</sup> | Ni-NPs (Particles /mL)  | Zeta potential (mV) |
|-----------------|---------------------------------------|-------------------------|---------------------|
| 1x (7.5 mg/mL)  | 109.7 $\pm$ 11.3                      | 11.1 x 10 <sup>12</sup> | -15.5 $\pm$ 2.1     |
| 2x (15 mg/mL)   | 138.3 $\pm$ 11.6                      | 17.4 x 10 <sup>12</sup> | -12.2 $\pm$ 1.3     |
| 5x (37.5 mg/mL) | 152.0 $\pm$ 14.0                      | 41.7 x 10 <sup>12</sup> | -13.5 $\pm$ 0.8     |

| Ni-NP Conc.    | C1S1 Conc. ( $\mu\text{g ml}^{-1}$ ) | % Conjugation <sup>§</sup> |
|----------------|--------------------------------------|----------------------------|
| 1x (7.5 mg/mL) | 150                                  | 87.5%                      |
|                | 240                                  | 91.2%                      |
|                | 300                                  | 85.8%                      |
|                | 200                                  | 89.8%                      |
| 2x (15 mg/mL)  | 240                                  | 93.3%                      |

| Ni-NP Conc.    | C2S5 Conc. ( $\mu\text{g mL}^{-1}$ ) | % Conjugation |
|----------------|--------------------------------------|---------------|
| 1x (7.5 mg/mL) | 150                                  | 89.8%         |
|                | 240                                  | 91.6%         |
|                | 300                                  | 93.1%         |
|                | 400                                  | 90.7%         |
|                | 500                                  | 87.9%         |
| 2x (15 mg/mL)  | 300                                  | 96.2%         |

| Ni-NP Conc.   | C5S3 Conc. ( $\mu\text{g mL}^{-1}$ ) | % Conjugation |
|---------------|--------------------------------------|---------------|
|               | 240                                  | 90.3%         |
|               | 300                                  | 89.2%         |
|               | 400                                  | 76.5%         |
| 2x (15 mg/mL) | 240                                  | 92.4%         |

‡ NanoSight analysis to quantify the number of NPs in a  $7.5 \text{ mg mL}^{-1}$  of solution of NPs.

§ Conjugation optimization of His-tagged proteins to NPs determined by UV analysis at 280 nm.

### Supplementary Table 5. Immunogenicity of loop C linear peptide.

| Rabbit ID <sup>‡</sup>             | PA6606 | PA6607 | PA6608 | PA6609 | PA6610 | C4S3    |
|------------------------------------|--------|--------|--------|--------|--------|---------|
| ELISA End Point Titer <sup>§</sup> | 1 600  | 1 600  | 1 600  | 25 600 | 12 800 | 409 600 |

‡ Five rabbits were immunized with a synthetic peptide with the loop C sequence (CONE 4). The titers of rabbit sera were measured at day 56 and compared to that of C4S3-immunized rabbits at the same time point.

§ Sera titers are reported as the reciprocal of serum dilution, and values are calculated by measuring the dilution point where the absorbance drops below 0.2 at OD405 (4 times background).
